# Supplementary material for: Interpretability of Clinical Decision Support Systems Based on Artificial Intelligence from Technological and Medical Perspective: A Systematic Review
Source: Hindawi journal article supplement (doi:10.1155/2023/9919269), 2023-01-01
Supplement: f1 [file 9919269.f1.pdf]

|                                 |                                                                                                                                            |     |     |     |     |     |     |     |     |     |     |     |     |     |     |     |     |     |      |     |     |
|---------------------------------|--------------------------------------------------------------------------------------------------------------------------------------------|-----|-----|-----|-----|-----|-----|-----|-----|-----|-----|-----|-----|-----|-----|-----|-----|-----|------|-----|-----|
| 6                               | Have ethical issues been taken into consideration?                                                                                         | 0   | 0   | 0   | 0   | 1   | 0   | 0   | 1   | 0   | 0   | 0   | 0   | 0   | 0   | 0   | 0   | 0   | 1    | 0   | 0   |
| 7                               | Was the data analysis sufficiently rigorous?                                                                                               | 1   | 1   | 1   | 1   | 0   | 1   | 0   | 1   | 1   | 1   | 0   | 0   | 0   | 1   | 1   | 1   | 1   | 0    | 1   | 1   |
| 8                               | Is there a clear statement of findings?                                                                                                    | 1   | 1   | 1   | 1   | 1   | 1   | 1   | 1   | 1   | 1   | 1   | 1   | 1   | 1   | 1   | 1   | 1   | 1    | 1   | 1   |
| <b>Outcomes of the research</b> |                                                                                                                                            |     |     |     |     |     |     |     |     |     |     |     |     |     |     |     |     |     |      |     |     |
| 9                               | Researcher(s) have discussed the contribution of the study to the existing knowledge or understanding:                                     | 1   | 1   | 1   | 1   | 1   | 1   | 1   | 1   | 1   | 1   | 1   | 1   | 1   | 1   | 1   | 1   | 1   | 1    | 1   | 1   |
| 9                               | Researcher(s) have identified new areas where research is necessary:                                                                       | 1   | 1   | 1   | 1   | 1   | 1   | 1   | 1   | 1   | 1   | 1   | 1   | 1   | 1   | 1   | 1   | 1   | 1    | 1   | 1   |
| 9                               | Paper has addressed whether or how the findings can be transferred to other populations or considered other ways the research may be used: | 1   | 1   | 1   | 1   | 0   | 0   | 1   | 1   | 1   | 1   | 1   | 1   | 1   | 1   | 1   | 1   | 0   | 1    | 1   | 1   |
|                                 | <b>Quality score</b>                                                                                                                       | 0.9 | 0.9 | 0.9 | 0.9 | 0.8 | 0.8 | 0.8 | 1.0 | 0.9 | 0.9 | 0.8 | 0.8 | 0.8 | 0.9 | 0.9 | 0.9 | 0.8 | 0.91 | 0.9 | 0.9 |
|                                 |                                                                                                                                            | 1   | 1   | 1   | 1   | 2   | 2   | 2   | 0   | 1   | 1   | 2   | 2   | 2   | 1   | 1   | 2   | 2   |      | 1   | 1   |
